# Supplementary material
Source: PubMed Central journal article supplement (PMC4128918)

Figure S1

A

| chr         | pos1            | pos2            | kb             | nSNP      | density      |
|-------------|-----------------|-----------------|----------------|-----------|--------------|
| Family 1810 |                 |                 |                |           |              |
| 1           | 156131095       | 158736215       | 2605.12        | 120       | 21.71        |
| 2           | 230663576       | 233243793       | 2580.22        | 41        | 62.93        |
| 3           | 153839960       | 158538056       | 4698.10        | 53        | 88.64        |
| 11          | 43776481        | 48346932        | 4570.45        | 96        | 47.61        |
| 11          | <b>56510672</b> | <b>59224720</b> | <b>2714.05</b> | <b>55</b> | <b>49.35</b> |
| 13          | 31495733        | 33704065        | 2208.33        | 46        | 48.01        |
| 16          | 55866894        | 58566304        | 2699.41        | 95        | 28.41        |
| 21          | 37425955        | 41450573        | 4024.62        | 70        | 57.49        |

| chr          | pos1            | pos2            | kb              | nSNP        | density     |
|--------------|-----------------|-----------------|-----------------|-------------|-------------|
| Family 72597 |                 |                 |                 |             |             |
| 2            | 1.86E+08        | 1.88E+08        | 1278.95         | 201         | 6.36        |
| 2            | 2.36E+08        | 2.41E+08        | 4937.64         | 1394        | 3.54        |
| 4            | 24451810        | 31785258        | 7333.45         | 1647        | 4.45        |
| 4            | 58036217        | 79877936        | 21841.72        | 4830        | 4.52        |
| 4            | 1.2E+08         | 1.27E+08        | 6749.94         | 1423        | 4.74        |
| 7            | 96434961        | 1.15E+08        | 18318.38        | 1330        | 13.77       |
| 11           | 45006741        | 51563636        | 6556.90         | 788         | 8.32        |
| 11           | <b>54828062</b> | <b>74913756</b> | <b>20085.69</b> | <b>3341</b> | <b>6.01</b> |
| 22           | 18541497        | 26759278        | 8217.78         | 1577        | 5.21        |

| chr         | pos1            | pos2            | kb             | nSNP        | density     |
|-------------|-----------------|-----------------|----------------|-------------|-------------|
| Family 1327 |                 |                 |                |             |             |
| 1           | 155629483       | 156130654       | 501.17         | 518         | 0.97        |
| 11          | <b>55110770</b> | <b>58345418</b> | <b>3234.65</b> | <b>2079</b> | <b>1.56</b> |
| 11          | 59426278        | 60617812        | 1191.53        | 626         | 1.90        |
| 14          | 21559714        | 22102315        | 542.60         | 632         | 0.86        |
| 19          | 11708361        | 12502315        | 793.95         | 585         | 1.36        |
| 22          | 31673111        | 32340837        | 667.73         | 631         | 1.06        |
| 22          | 41925207        | 42524310        | 599.10         | 577         | 1.04        |
| X           | 69504091        | 70586311        | 1082.22        | 577         | 1.88        |

| chr         | pos1            | pos2            | kb              | nSNP        | density     |
|-------------|-----------------|-----------------|-----------------|-------------|-------------|
| Family 1337 |                 |                 |                 |             |             |
| 1           | 9416346         | 15723843        | 6307.50         | 1111        | 5.68        |
| 1           | 1.96E+08        | 2.05E+08        | 8842.50         | 1454        | 6.08        |
| 2           | 2.12E+08        | 2.24E+08        | 11547.29        | 1349        | 8.56        |
| 3           | 1.19E+08        | 1.22E+08        | 3717.27         | 571         | 6.51        |
| 4           | 85704           | 4322981         | 4237.28         | 1009        | 4.20        |
| 7           | 538191          | 2998173         | 2459.98         | 667         | 3.69        |
| 11          | 1246941         | 7335198         | 6088.26         | 1744        | 3.49        |
| 11          | <b>45671280</b> | <b>61300476</b> | <b>15629.20</b> | <b>1964</b> | <b>7.96</b> |
| 12          | 11992168        | 55421250        | 43429.08        | 4227        | 10.27       |
| 16          | 64981764        | 78466521        | 13484758        | 2267        | 5948.28     |
| 22          | 17956759        | 32815398        | 14858640        | 2922        | 5085.09     |

B

| Family-1810-6-1 |       |          |          |         | Family-1327-2 |       |          |          |            | Family-1337-2 |       |          |          |     | Family-57718 |          |       |          |          |     |     |
|-----------------|-------|----------|----------|---------|---------------|-------|----------|----------|------------|---------------|-------|----------|----------|-----|--------------|----------|-------|----------|----------|-----|-----|
| Genotype        | Chrom | Pos      | dbSNP    | Ref/Alt | Genotype      | Chrom | Pos      | dbSNP    | Ref/Alt    | Genotype      | Chrom | Pos      | dbSNP    | Ref | Alt          | Genotype | Chrom | Pos      | dbSNP    | Ref | Alt |
| Het             | 11    | 57004386 |          | G/A     |               | 11    | 57004386 |          | G/NC       |               | 11    | 57004386 |          | G   | NC           | Hom      | 11    | 57004386 |          | G   | G   |
|                 | 11    | 57077351 |          | G/C     | Het           | 11    | 57077351 |          | G/C        |               | 11    | 57077351 |          | G   | C            | Hom      | 11    | 57077351 |          | G   | C   |
| Hom             | 11    | 57081197 | 4939134  | G/C     | Hom           | 11    | 57081197 | 4939134  | G/C        | Hom           | 11    | 57081197 | 4939134  | G   | C            | Hom?     | 11    | 57081197 | 4939134  | G   | C   |
| Hom             | 11    | 57117385 | 2276042  | C/T     | Hom           | 11    | 57117385 | 2276042  | C/T        | Hom           | 11    | 57117385 | 2276042  | C   | T            | Hom      | 11    | 57117385 | 2276042  | C   | C   |
|                 | 11    | 57135663 | 78580111 | A/NC    | Hom           | 11    | 57135663 | 78580111 | A/AG       | Hom           | 11    | 57135663 | 78580111 | A   | AG           | Hom      | 11    | 57135663 | 78580111 | A   | NC  |
| Hom             | 11    | 57137371 | 2276039  | G/A     | Hom           | 11    | 57137371 | 2276039  | G/A        | Hom           | 11    | 57137371 | 2276039  | G   | A            | Hom      | 11    | 57137371 | 2276039  | G   | G   |
| Hom             | 11    | 57137424 | 2276038  | C/T     | Hom           | 11    | 57137424 | 2276038  | C/T        | Hom           | 11    | 57137424 | 2276038  | C   | T            | Hom      | 11    | 57137424 | 2276038  | C   | C   |
|                 | 11    | 57137538 | 74770235 | A/NC    | Hom           | 11    | 57137538 | 74770235 | A/AG       | Hom           | 11    | 57137538 | 74770235 | A   | AG           | Hom      | 11    | 57137538 | 74770235 | A   | NC  |
| Hom             | 11    | 57147016 | 540687   | A/G     | Hom           | 11    | 57147016 | 540687   | A/G        | Hom           | 11    | 57147016 | 540687   | A   | G            | Hom      | 11    | 57147016 | 540687   | A   | G   |
|                 | 11    | 57148053 | 571651   | G/T     | Hom           | 11    | 57148053 | 571651   | G/T        | Hom           | 11    | 57148053 | 571651   | G   | T            | Hom      | 11    | 57148053 | 571651   | G   | T   |
| Hom             | 11    | 57148175 | 669661   | A/G     | Hom           | 11    | 57148175 | 669661   | A/G        | Hom           | 11    | 57148175 | 669661   | A   | G            | Hom      | 11    | 57148175 | 669661   | A   | G   |
| Hom             | 11    | 57155001 | 536455   | G/A     | Hom           | 11    | 57155001 | 536455   | G/A        | Hom           | 11    | 57155001 | 536455   | G   | A            | Hom      | 11    | 57155001 | 536455   | G   | A   |
| Hom             | 11    | 57155288 | 630396   | T/C     | Hom           | 11    | 57155288 | 630396   | T/NC       | Hom           | 11    | 57155288 | 630396   | T   | C            | Hom      | 11    | 57155288 | 630396   | T   | C   |
| Het             | 11    | 57156438 | 3741089  | A/G     | Hom           | 11    | 57156438 | 3741089  | A/G        | Hom           | 11    | 57156438 | 3741089  | A   | G            | Hom      | 11    | 57156438 | 3741089  | A   | G   |
| Hom             | 11    | 57157405 | 490358   | A/G     | Hom           | 11    | 57157405 | 490358   | A/G        | Hom           | 11    | 57157405 | 490358   | A   | G            | Hom      | 11    | 57157405 | 490358   | A   | A   |
|                 | 11    | 57184218 | 4938865  | C/NC    | Hom           | 11    | 57184218 | 4938865  | C/T        | Hom           | 11    | 57184218 | 4938865  | C   | T            | Hom      | 11    | 57184218 | 4938865  | C   | NC  |
| Hom             | 11    | 57243588 | 2258835  | A/G     | Hom           | 11    | 57243588 | 2258835  | A/G        | Hom           | 11    | 57243588 | 2258835  | A   | NC           | Hom      | 11    | 57243588 | 2258835  | A   | G   |
|                 | 11    | 57268170 | 2250673  | T/NC    | Hom           | 11    | 57268170 | 2250673  | T/C        | Hom           | 11    | 57268170 | 2250673  | T   | C            | Hom      | 11    | 57268170 | 2250673  | T   | C   |
| Hom             | 11    | 57310307 | 80123614 | A/G     | Hom           | 11    | 57310307 | 80123614 | A/G        | Hom           | 11    | 57310307 | 80123614 | A   | G            | Hom      | 11    | 57310307 | 80123614 | A   | A   |
|                 | 11    | 57317640 | 8890     | C/NC    | Hom           | 11    | 57317640 | 8890     | C/T        | Hom           | 11    | 57317640 | 8890     | C   | T            | Hom      | 11    | 57317640 | 8890     | C   | C   |
|                 | 11    | 57320044 | 2234412  | T/C     | Hom           | 11    | 57320044 | 2234412  | T/C        | Hom           | 11    | 57320044 | 2234412  | T   | C            | Hom      | 11    | 57320044 | 2234412  | T   | C   |
| Hom             | 11    | 57427367 |          | G/A     | Hom           | 11    | 57427367 |          | G/A        | Hom           | 11    | 57427367 |          | G   | A            | Hom      | 11    | 57427367 |          | G   | A   |
|                 | 11    | 57461472 |          | TG/NC   | Het           | 11    | 57461472 |          | TG/T       | Hom           | 11    | 57461472 |          | TG  | NC           | Hom      | 11    | 57461472 |          | TG  | T   |
|                 | 11    | 57472141 |          | G/NC    | Het           | 11    | 57472141 |          | G/GTTTTTTT | Hom           | 11    | 57472141 |          | G   | NC           | Hom      | 11    | 57472141 |          | G   | G   |
|                 | 11    | 57472167 |          | G/NC    | Het           | 11    | 57472167 |          | G/T        | Hom           | 11    | 57472167 |          | G   | NC           | Hom      | 11    | 57472167 |          | G   | G   |
|                 | 11    | 57472168 |          | C/NC    | Het           | 11    | 57472168 |          | C/T        | Hom           | 11    | 57472168 |          | C   | NC           | Hom      | 11    | 57472168 |          | C   | C   |
| Hom             | 11    | 57509429 | 635663   | A/G     | Hom           | 11    | 57509429 | 635663   | A/G        | Hom           | 11    | 57509429 | 635663   | A   | G            | Hom      | 11    | 57509429 | 635663   | A   | G   |
| Hom             | 11    | 57563991 | 10896644 | C/T     | Hom           | 11    | 57563991 | 10896644 | C/T        | Hom           | 11    | 57563991 | 10896644 | C   | T            | Hom      | 11    | 57563991 | 10896644 | C   | T   |
| Hom             | 11    | 57571232 | 11229137 | C/T     | Hom           | 11    | 57571232 | 11229137 | C/T        | Hom           | 11    | 57571232 | 11229137 | C   | T            | Hom      | 11    | 57571232 | 11229137 | C   | T   |
| Hom             | 11    | 57799108 | 34846253 | AC/NC   | Hom           | 11    | 57799108 | 34846253 | AC/A       | Hom           | 11    | 57799108 | 34846253 | AC  | NC           | Hom      | 11    | 57799108 | 34846253 | AC  | A   |
| Hom             | 11    | 57799371 | 1374570  | G/C     | Hom           | 11    | 57799371 | 1374570  | G/C        | Hom           | 11    | 57799371 | 1374570  | G   | C            | Hom      | 11    | 57799371 | 1374570  | G   | C   |
| Hom             | 11    | 57947264 | 11229273 | C/G     | Hom           | 11    | 57947264 | 11229273 | C/G        | Hom           | 11    | 57947264 | 11229273 | C   | G            | Hom      | 11    | 57947264 | 11229273 | C   | G   |
| Hom             | 11    | 57958775 | 7120468  | C/T     | Hom           | 11    | 57958775 | 7120468  | C/T        | Hom           | 11    | 57958775 | 7120468  | C   | T            | Hom      | 11    | 57958775 | 7120468  | C   | T   |
|                 | 11    | 57971171 |          | NC/Het  | Hom           | 11    | 57971171 |          | C/T        | Hom           | 11    | 57971171 |          | C   | NC           | Hom      | 11    | 57971171 |          | C   | C   |
| Hom             | 11    | 57971195 | 11229279 | G/A     | Hom           | 11    | 57971195 | 11229279 | G/A        | Hom           | 11    | 57971195 | 11229279 | G   | NC           | Hom      | 11    | 57971195 | 11229279 | G   | A   |
| Hom             | 11    | 57971201 | 11229280 | G/A     | Hom           | 11    | 57971201 | 11229280 | G/A        | Hom           | 11    | 57971201 | 11229280 | G   | NC           | Hom      | 11    | 57971201 | 11229280 | G   | A   |
| Hom             | 11    | 57982229 | 1966836  | A/G     | Hom           | 11    | 57982229 | 1966836  | A/G        | Hom           | 11    | 57982229 | 1966836  | A   | G            | Hom      | 11    | 57982229 | 1966836  | A   | G   |
| Hom             | 11    | 57982584 | 1966835  | T/C     | Hom           | 11    | 57982584 | 1966835  | T/C        | Hom           | 11    | 57982584 | 1966835  | T   | NC           | Hom      | 11    | 57982584 | 1966835  | T   | C   |
| Hom             | 11    | 57982620 | 1966834  | A/G     | Hom           | 11    | 57982620 | 1966834  | A/G        | Hom           | 11    | 57982620 | 1966834  | A   | G            | Hom      | 11    | 57982620 | 1966834  | A   | G   |
| Het             | 11    | 57982726 | 1993089  | G/T     | Hom           | 11    | 57982726 | 1993089  | G/T        | Hom           | 11    | 57982726 | 1993089  | G   | NC           | Hom      | 11    | 57982726 | 1993089  | G   | T   |

C

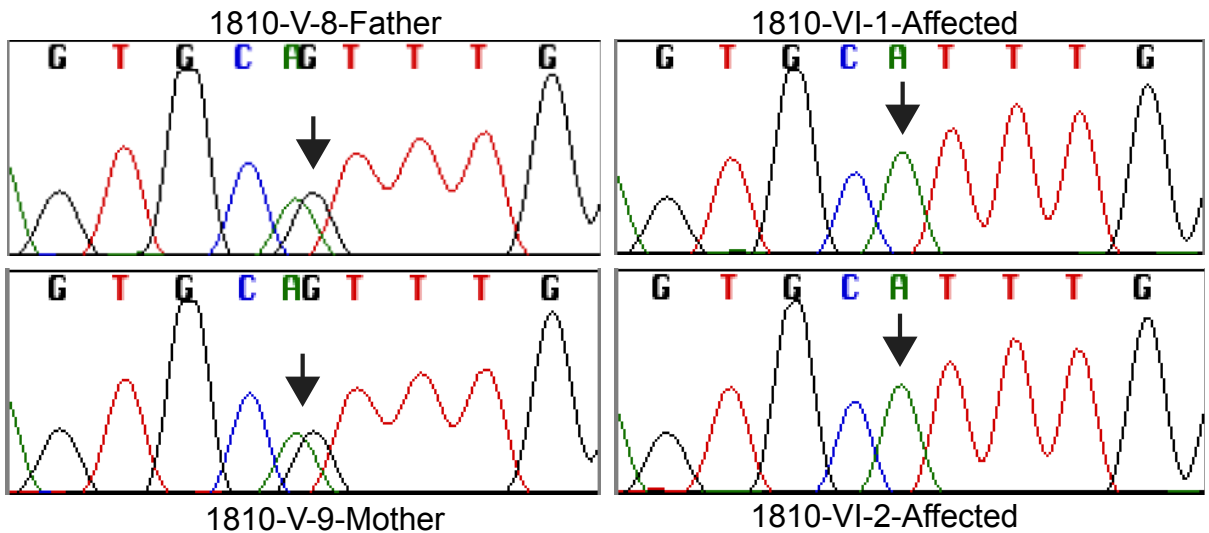

Supplement: NIHMS611879-supplement-1.pdf [file NIHMS611879-supplement-1.pdf]
