# Supplementary material
Source: PubMed Central journal article supplement (PMC4128918)

Figure S2

**A**

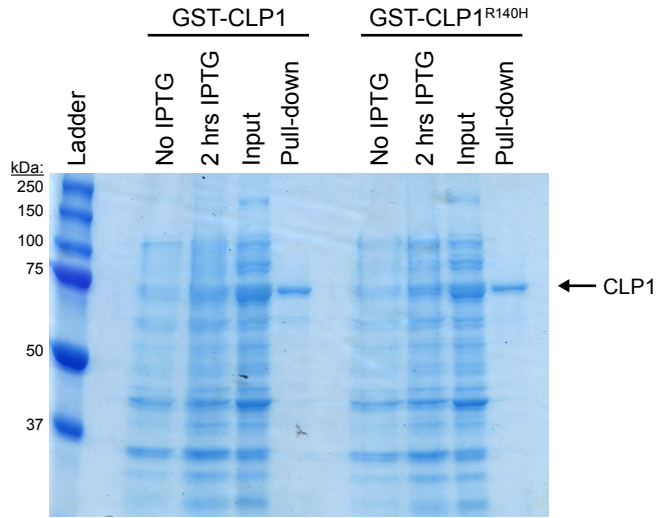

**B**

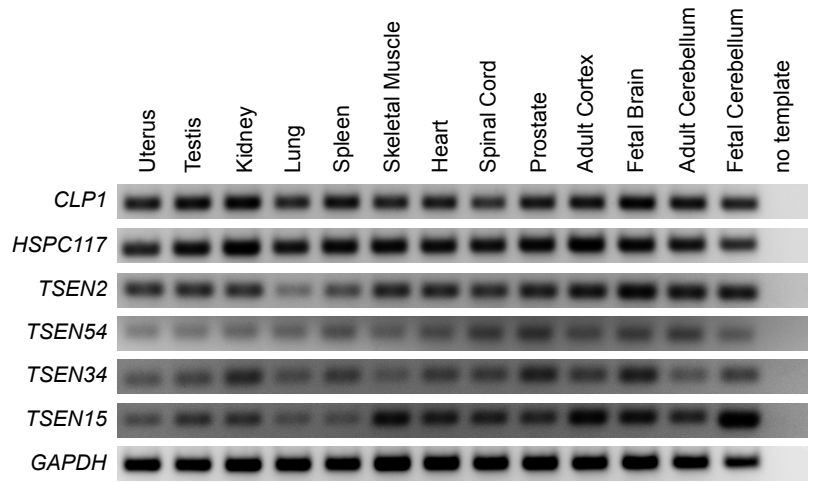

**C**

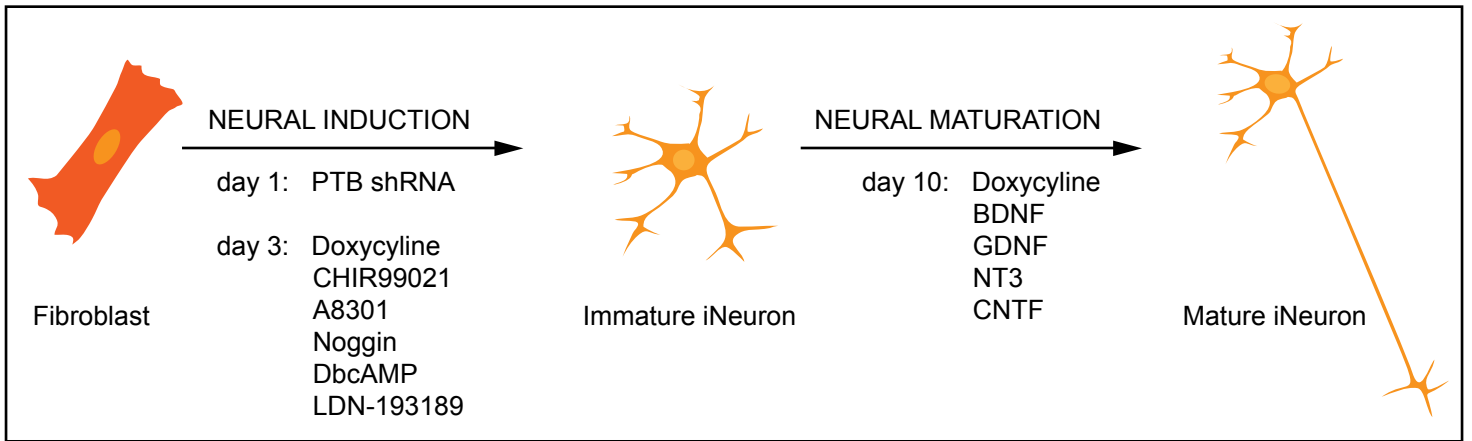

**D**

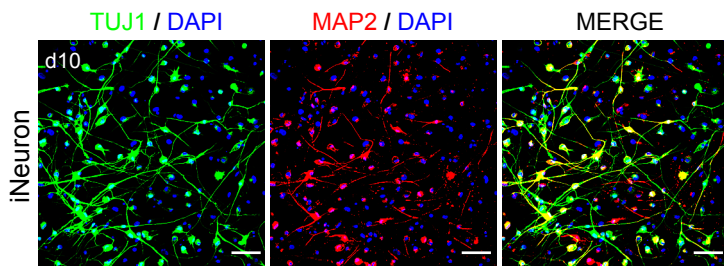

**E**

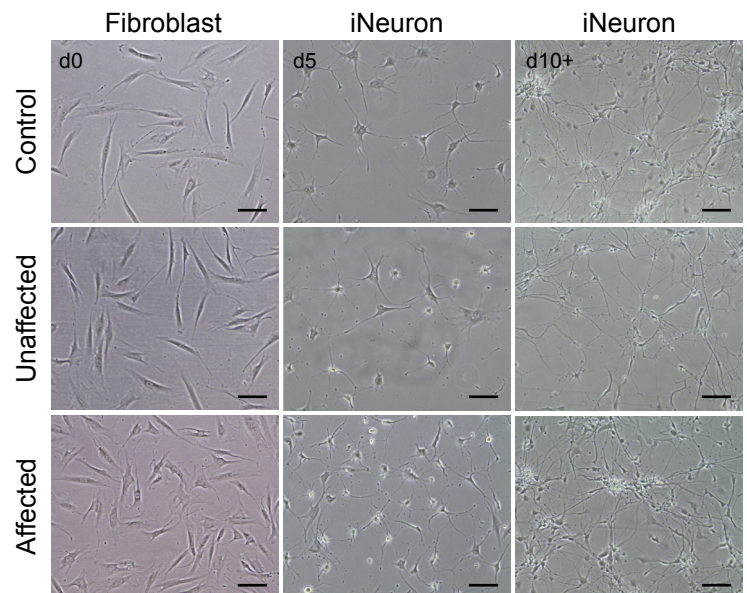

Supplement: NIHMS611879-supplement-2.pdf [file NIHMS611879-supplement-2.pdf]

**Figure 3**

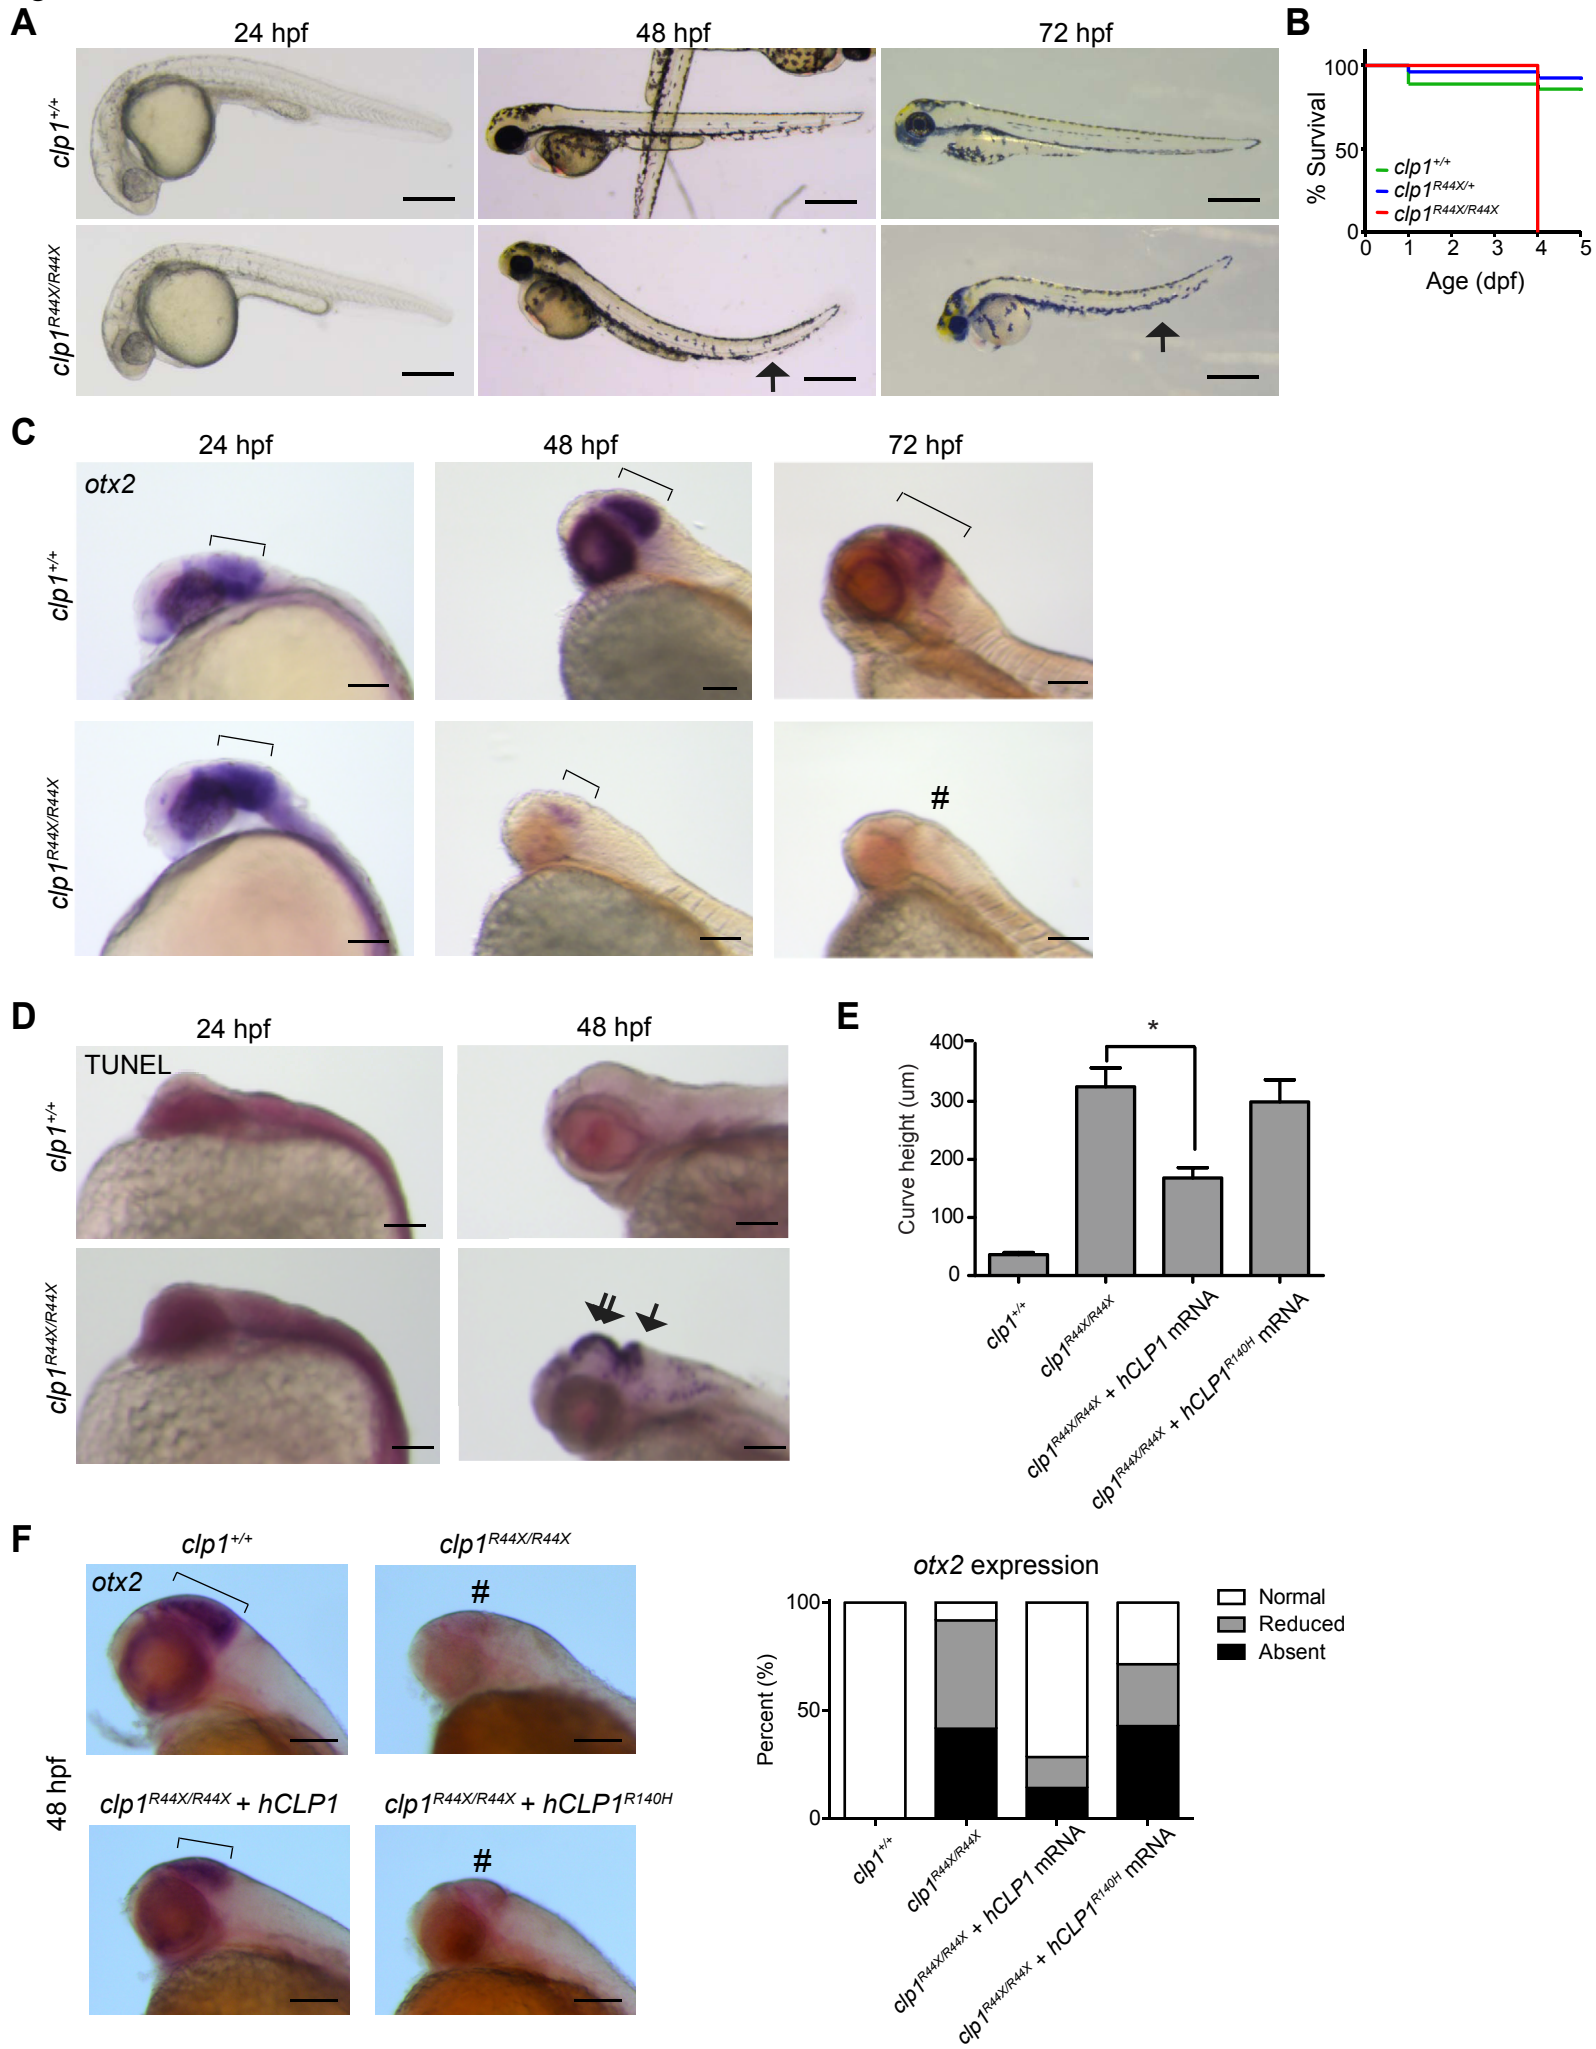

Supplement: NIHMS611879-supplement-3.pdf [file NIHMS611879-supplement-3.pdf]

Figure S4

**A**

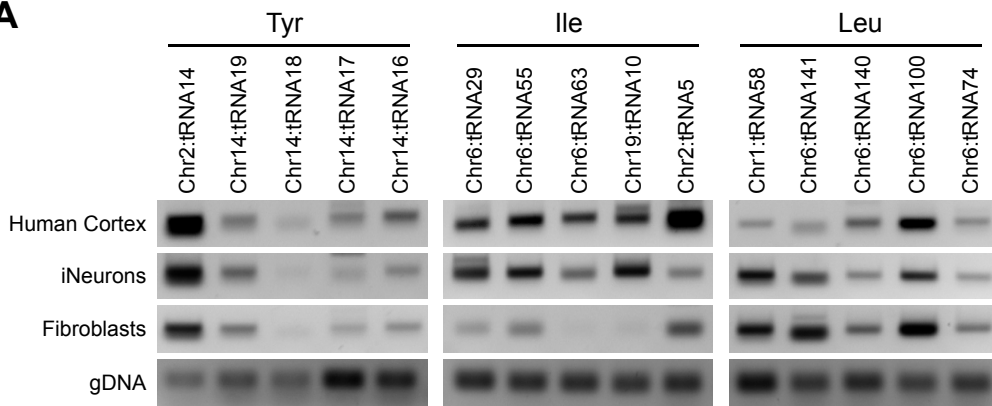

**B**

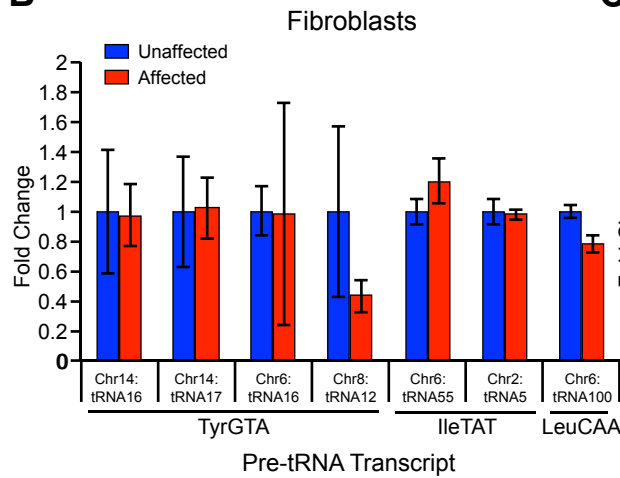

**C**

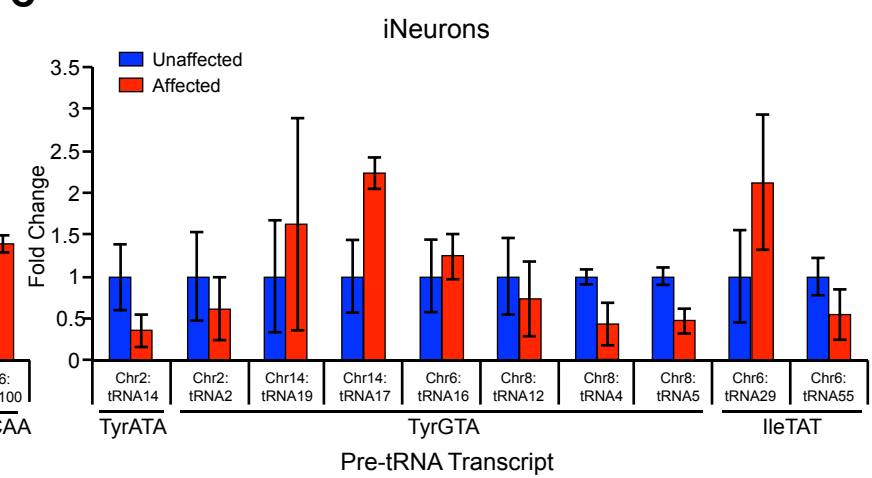

**D**

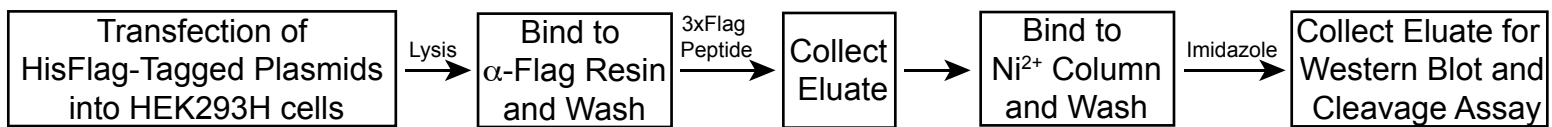

**E**

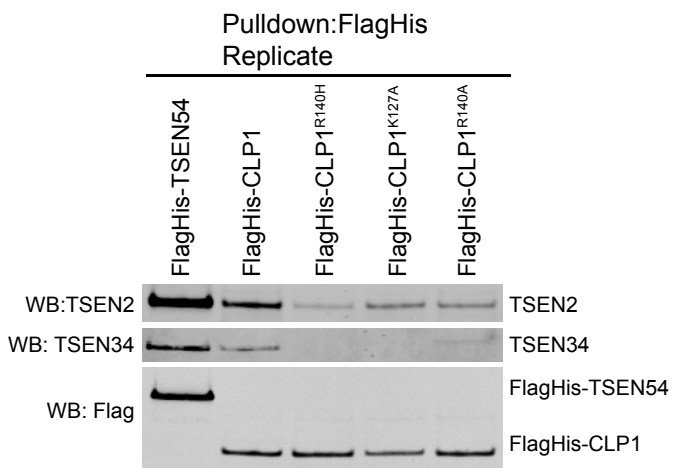

**F**

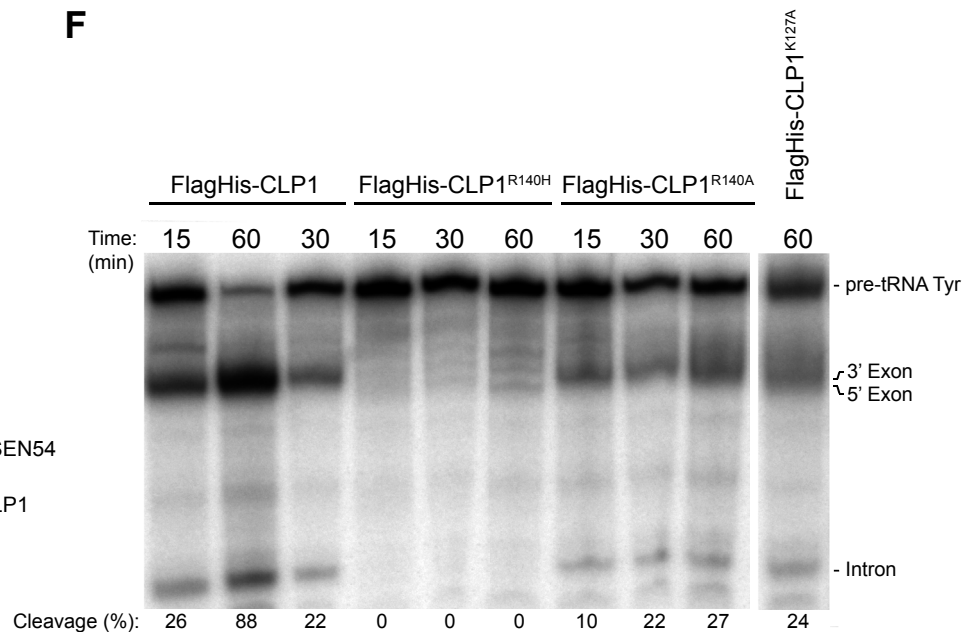

Supplement: NIHMS611879-supplement-4.pdf [file NIHMS611879-supplement-4.pdf]

Figure S5

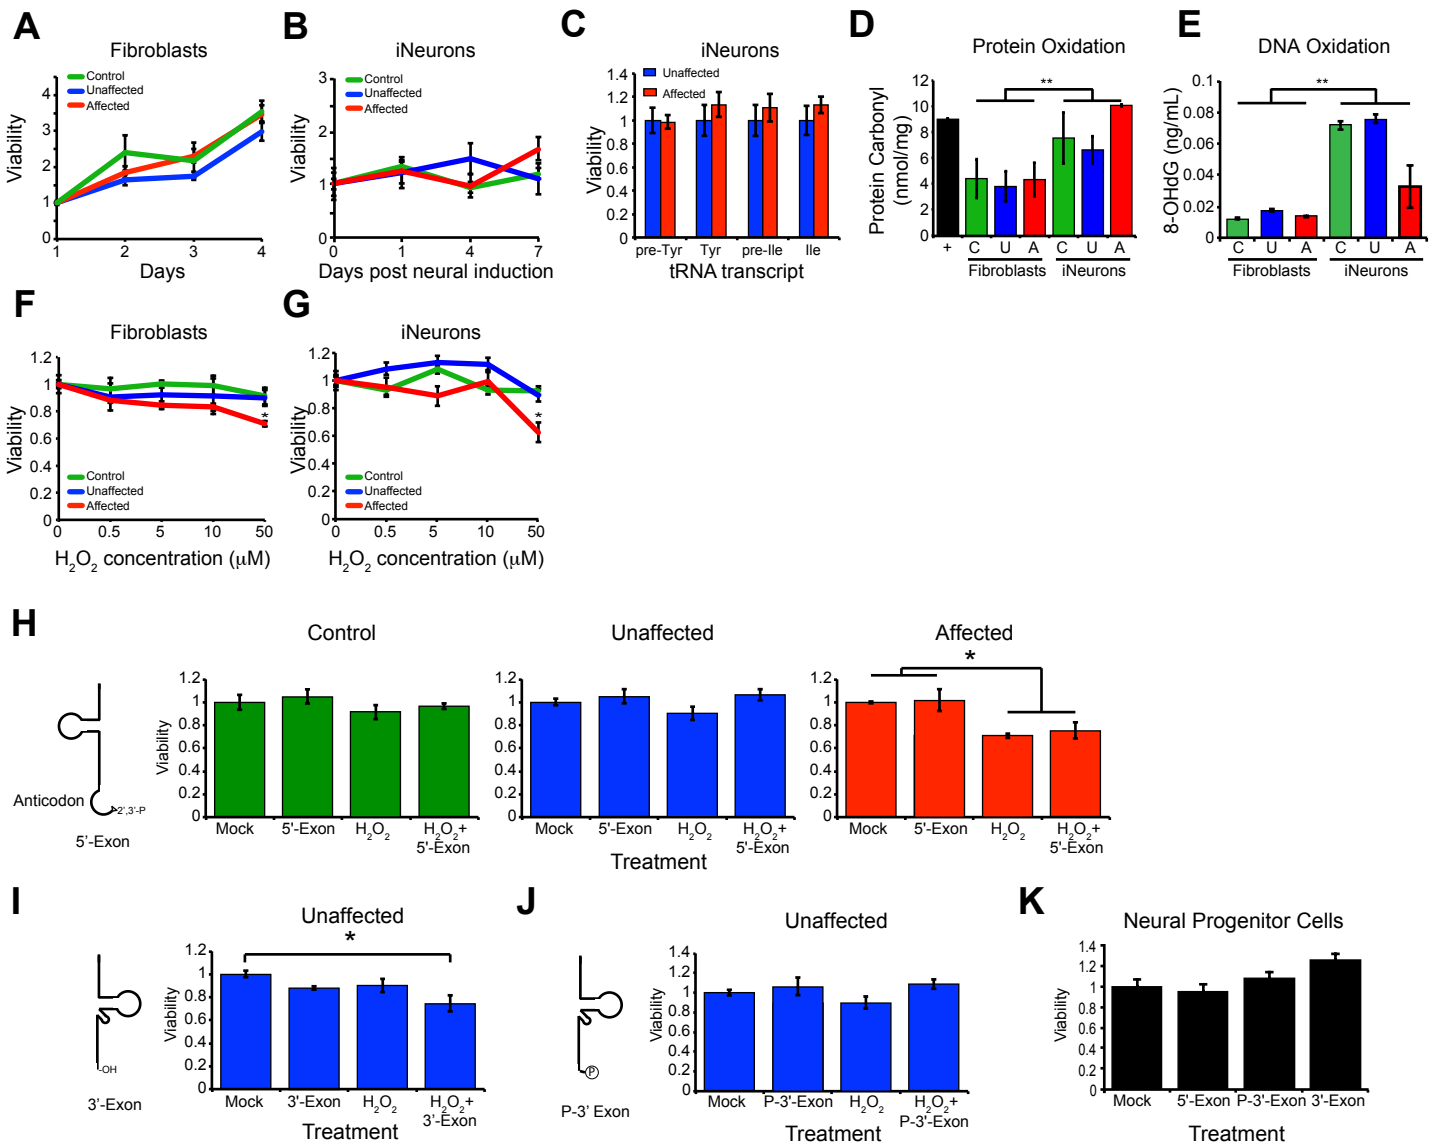

Supplement: NIHMS611879-supplement-5.pdf [file NIHMS611879-supplement-5.pdf]
